# Supplementary material
Source: Springer Nature journal article supplement (https://www.springermedizin.de/resource/supplementary/13075_2013_4432_MOESM8_ESM.pdf/10110394)

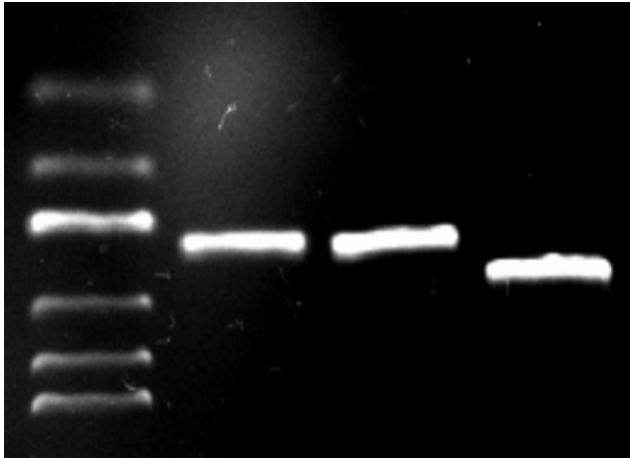

DNA  
Marker

IL-28R $\alpha$

IL-10R2

GAPDH

Supplement: MOESM8 [file 10110394]
